# On the fitness of informative cues in complex environments

Fabrizio Mafessoni<sup>1\*</sup>, Michael Lachmann<sup>2</sup> and Chaitanya S. Gokhale<sup>3</sup>

<sup>1</sup>Department of Evolutionary Genetics,  
Max-Planck-Institute for Evolutionary Anthropology  
Deutscher Platz 6, 04103 Leipzig, Germany

<sup>2</sup>Santa Fe Institute, Santa Fe, NM, USA

<sup>3</sup>Research Group for Theoretical Models of Eco-evolutionary Dynamics,  
Department of Evolutionary Theory, Max Planck Institute for Evolutionary Biology,  
August Thienemann Str. 2, 24306, Plön, Germany,

\*fabrizio\_mafessoni@eva.mpg.de

## Abstract

To be able to deal with uncertainty is of primary importance to all organisms. When cues provide information about the state of the environment, organisms can use them to respond flexibly. Thus information can provide fitness advantages. Without environmental cues, an organism can reduce the risks of environmental uncertainty by hedging its bets across different scenarios. Risk mitigation is then possible by adopting a life-history of bet-hedging, either randomly switching between phenotypes (diversifying bet-hedging) or adopting intermediate phenotypes (conservative bet-hedging). Hence, understanding patterns of bet-hedging is necessary in order to quantify the fitness benefit of environmental cues, since it provides a baseline fitness in the absence of informative cues. Quantifying fitness benefits in terms of mutual information reveals deep connections between Darwinian evolution and information theory. However, physiological constraints or complex ecological scenarios often lead to the number of environmental states to exceed that of potential phenotypes, or a single intermediate phenotype is adopted, as in the case of conservative bet-hedging. Incorporating these biological complexities, we generalise the relationship between information theory and Darwinian fitness. Sophisticated bet-hedging strategies - combining diversifying and conservative bet-hedging - can then evolve. We show that, counterintuitively, environmental complexity can reduce, rather than increase, the number of phenotypes that an organism can adopt. In conclusion, we develop an information-theoretic extensible approach for investigating and quantifying fitness in ecological studies.

25 Keywords: Shannon Information, nonlinear fitness, stochastic switching, inaccessible pheno-  
26 types

## 27 **1 Introduction**

28 Change is a significant constant in the natural world. Organisms have to be plastic enough to  
29 ride out the variability in the environment. A potential strategy to cope with this variability  
30 is to be plastic by relying on information provided by environmental cues. An informative  
31 cue is “a feature of the world, animate or inanimate, which can be used by an animal to guide  
32 future actions” [1, 2], or development. Many organisms demonstrate a plastic response to the  
33 environment, using environmental cues to modulate their phenotype [3].

34 However, some of the most basic adaptive mechanisms do not require informative cues.  
35 For instance, a wide genetic diversity results in a better response of populations to random  
36 environmental fluctuations [4]. Another way can be for an organism to adopt a life history of  
37 “bet-hedging”. This is possible via adopting a generalist phenotype (conservative bet-hedging)  
38 or by randomly switching between different phenotypes, within or between generations (diver-  
39 sifying bet-hedging) [5, 6, 7, 8]. Hereafter we use bet-hedging as a synonym for diversifying  
40 bet-hedging.

41 Even without genetic variation in the population, bet-hedging enables coping with un-  
42 certain environments [9, 10, 11]: when all individuals in a population experience the same  
43 environmental state, developmental variability in the phenotypes of an individual’s offspring  
44 will ensure that at least part of its progeny will develop a proper phenotype for the current  
45 environmental state. The theory of bet-hedging has had a long history [12, 13, 14, 15] and  
46 instances of this phenomenon can be observed in nature [16, 17, 18]. The bet-hedging theory  
47 hinges on the trade-off between maximizing short term fitness and reducing the adverse long  
48 term effects of its variability due to the stochasticity of the environment. Interestingly, even  
49 when cues are present but do not provide full information, bet-hedging can still occur as a  
50 consequence of their uncertainty [19].

51 Previous studies quantified the fitness values of informative cues by comparing the fitness  
52 of plastic strategies relying on cues and of bet-hedging strategies, not relying on any cue.  
53 These studies pointed to a tight relationship between evolution and information. In simple  
54 cases where the number of phenotypes equals that of environmental states, bits can quan-  
55 tify the evolutionary benefit of an informative cue [20]. While information theory provides a  
56 promising framework to study evolution, relatively few studies used this framework to study  
57 ecological and evolutionary phenomena [21]. In this study, we extend the information theory  
58 approach previously described by Bergstrom and Lachmann [20, 22] to examine the effects

59 of more complex scenarios. In nature, often environmental complexity exceeds physiological  
60 and evolutionary flexibility, and the number of possible environmental states might exceed  
61 that of phenotypes. For example, the phenotypes might lie far from each other in the fitness  
62 landscape to be accessible, or physiological constraints in an organism might limit the variety  
63 of phenotypes it can develop. Besides, one of the available phenotypes may perform better  
64 in more than one environment. In these cases, as environmental complexity increases, the  
65 optimal strategy is more likely the one in which the same phenotypes are adopted in response  
66 to different environmental states, i.e. conservative bet-hedging occurs along with diversifying  
67 bet-hedging. These instances, in which the number of environmental states exceeds the num-  
68 ber of phenotypes, are the focus of this study. We show that in these cases, vibrant patterns of  
69 bet-hedging emerge and that, counterintuitively, the potential fitness value of informative cues  
70 can decrease.

71 We first begin by reviewing the connection between Shannon and Gould information as per  
72 [20, 22], by following the calculations from Donaldson-Matasci *et al.* [22] where an organism  
73 can have as many phenotypes as the number of environmental states (represented by a square  
74 matrix). Then we generalize this analysis to any number of phenotypes and environmental  
75 states. Inequality between the number of phenotypes and environmental states (represented  
76 by a non-square matrix) is also possible. We explore representative cases of asymmetric sce-  
77 narios, characterized by simple probability distributions describing the occurrence of different  
78 environmental states. In these cases, the best bet-hedging strategy depends on the probability  
79 of the environmental states in a non-linear fashion. We discuss some examples, among which  
80 those of organisms adapted only to a range of environmental conditions, for which often in-  
81 creased environmental uncertainty is present at the borders of their distribution. We show that  
82 relatively more complex scenarios, the fitness value of the informative cues is less than the mu-  
83 tual information between the cue and the environment. We generalize this observation to any  
84 asymmetric scenarios, showing that under the more natural asymmetric conditions of complex  
85 environments, a lower boundary to the fitness benefit of an informative cue is expected.

86 In biology, a direct method to quantify the impact of a cue is to compare the fitness when  
87 knowing and not knowing the cue. The difference in the fitness of the strategy adopted when  
88 knowing the cue and not knowing the cue is the value of the cue measured in units of fitness  
89 gained [23, 24]. Examples where such cues are essential range from the germination in seeds  
90 and diapause in insects, to offspring clutch size control by parents. If a cue provides complete  
91 information about the predators' presence, then the animal can opt more likely for a proper  
92 course of action. This measure is **Gould information**.

93 A classical method to quantify the value of an environmental cue is **Shannon Information**.  
94 Consider a fair coin. The two possible outcomes “heads” (1) and “tails” (0) are both likely with

95 equal probabilities ( $p_0 = p_1 = 0.5$ ). Hence the amount of surprise which we have when we  
96 know the result of a certain coin toss event  $E$  is simply,  $H(E) = -p_0 \log_2 p_0 - p_1 \log_2 p_1 = 1$ .  
97 This is the Shannon entropy as defined in classical information theory [25, 26]. Traditional  
98 approaches in statistical physics, communication, engineering and related fields make use of  
99 the concept of ‘mutual information’. The amount by which a cue ( $C$ ) reduces the uncertainty  
100 about the environment ( $E$ ) is defined as mutual information ( $I(E; C)$ ). It is measured in terms  
101 of entropy as,

$$I(E; C) = H(E) - H(E|C) \quad (1)$$

102 where  $H(E) = -\sum_e p_e \log p_e$  is the ‘entropy’ of the random variable  $E$  denoting the envi-  
103 ronment. Similarly  $H(E|C) = -\sum_c p_c \sum_e p(e|c) \log p(e|c)$  is the entropy when the cue has  
104 been received. Here  $p_c$  is the probability of observing the cue  $c$  and the probability that the  
105 environment is in state  $e$  when cue  $c$  is observed is given by  $p(e|c)$ . If a cue is not related  
106 to the environment, then the entropy remains unchanged ( $H(E|C) = H(E)$ ) and the mutual  
107 information between the cue and the environment is zero. However for a perfect cue this prob-  
108 ability is  $p(e|c) = 1$  and hence  $H(E|C) = 0$ . Thus the cue reveals the environment entirely,  
109 and the mutual information is precisely equal to the entropy of the system  $I(E; C) = H(E)$ .

110 Strong links exist between the two measures of the value of informative cues [20, 22].  
111 Studies show that if the environmental cue is flawlessly informative then for an intermediate  
112 probability of an adverse event occurring, the best approach is to bet-hedge. This region of  
113 probability space in which bet-hedging occurs is a function of the Shannon entropy, and the  
114 fitness value of information is bounded above by the Shannon entropy [20]. Thus an intimate  
115 connection exists between the classical information-theoretic approach and the biologically  
116 intuitive Gould information approach.

117 Throughout the analyses we adopt a geometric mean approach [27, 28, 22]. Whereas  
118 the arithmetic-mean does not capture the effects of environmental variance on fitness, the  
119 multiplicative nature of geometric-mean efficiently describes the effects on the growth rate  
120 as long as there are no interactions between the phenotypes, i.e. where the average fitness is  
121 frequency independent [12, 29, 30, 31]. Indeed, in a variable environment the allele having  
122 the higher geometric mean takes over the population [32, 33, 34]. Therefore short term fitness  
123 (usually considered in the frequency-dependent analysis, e.g. in evolutionary game theory)  
124 might not be the most useful statistic in case of environmental variability. Instead, a geometric  
125 mean approach can be fruitfully adopted in these cases, elucidating the role of bet-hedging  
126 strategies in minimizing fitness variability in the absence of informative cues [20, 22, 8].

## 127 2 Model and Results

### 128 2.1 Symmetric case: two environmental states with two phenotypes

129 Traditionally bet-hedging models have focused on the example of annual plants. We use it  
130 here as well, presenting a representative case using simple fictitious interaction matrices. A  
131 detailed description of possible ecological interpretations follows in the discussion.

132 A year could be wet  $e_1$  or dry  $e_2$ . Seeds of desert annuals are better off staying dormant  
133 over dry years and do better by germinating in wet years. This relationship can be represented  
134 in the form of an interaction matrix as follows,

$$\begin{array}{c} \text{Germinate} \\ \text{Dormant} \end{array} \begin{array}{cc} e_1 & e_2 \\ \left( \begin{array}{cc} 5 & 1 \\ 2 & 2 \end{array} \right), \end{array} \quad (2)$$

135 The probability that a flash flood occurs and a year is wet is  $p$ , while the year is dry with the  
136 probability  $(1 - p)$ . The gain of the two phenotypes averaged over the two environments are  
137 thus given by,

$$\begin{aligned} f_G &= 5p + 1(1 - p) \\ f_D &= 2p + 2(1 - p) \end{aligned} \quad (3)$$

138 These are the average fitnesses of the two phenotypes. The internal equilibrium of this system  
139 is at  $p^* = 1/4$ , where the fitnesses of the two strategies are equal. In the short run organisms  
140 will maximize their expected fitness by employing a strategy that maximizes its single gener-  
141 ation expected fitness,  $F(E) = \max[f_D, f_G]$  where  $E$  is a random variable representing the  
142 state of the environment (Fig. 1). Hence if the probability of a flash flood is greater than  $p^*$  it  
143 is better to germinate else staying dormant is a safe bet.

$$F(E) = \begin{cases} f_G & \text{for } p > p^* \text{ always Germinate} \\ f_D & \text{for } p < p^* \text{ always Dormant.} \end{cases} \quad (4)$$

144 In order to quantify the reduction in fitness due to environmental uncertainty, we can now  
145 suppose that the organisms might receive a cue  $C$ , which indicates the environmental state  
146 precisely. Therefore, then there is no confusion over choosing to germinate or not regardless  
147 of  $p$ . In this case the single generational expected fitness will be,  $F(E|C) = 5p + 2(1 - p)$ .  
148 The value of the cue is then is the difference between the fitness with the cue and without the  
149 cue,

$$\Delta F(E; C) = F(E|C) - F(E) \quad (5)$$

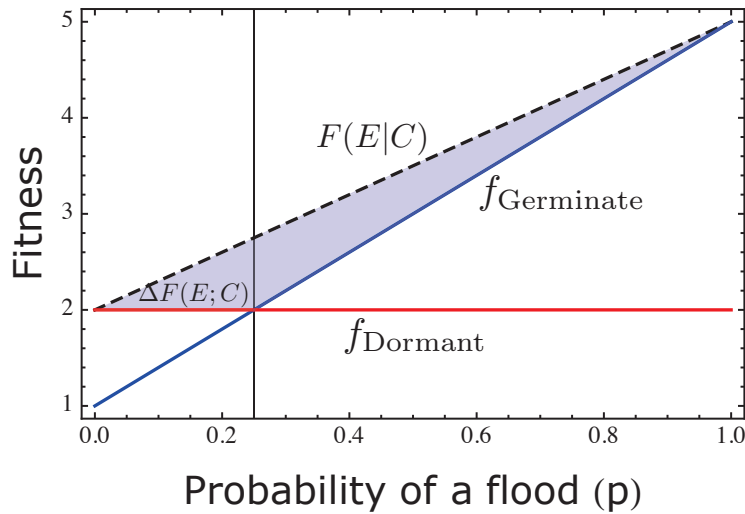

Figure 1: **Average fitnesses of the Germinate and remain Dormant strategies as a function of the probability of a flood  $p$ .** The internal equilibrium is given by the vertical line at  $p^* = 1/4$ . For  $p < p^*$  it pays to remain dormant while for  $p > p^*$  it is better to germinate. Knowing the state of the environment exactly from the cue a seed can obtain  $F(E|C)$ . Hence the fitness benefit due to the cue is given by the shaded area.

150 This is the result which we expect if the organism maximizes the single generational expected  
 151 fitness. However, in a temporally varying environment, the phenotype that is most likely to fix  
 152 over the long term is the one with the highest expected long-term growth rate. To approach  
 153 this question, we define the frequencies with which each phenotype is adopted in a given  
 154 season as  $x$  (Germinate) and  $1 - x$  (Dormant) respectively. The mean log fitness can estimate  
 155 the long-term growth rate of a given strategy, or, equivalently, the log of the geometric mean  
 156 fitness [12, 35, 36, 19]. The expected long term growth rate is then given by,

$$g(x) = p \log[env(e_1, x)] + (1 - p) \log[env(e_2, x)] \quad (6)$$

157 where the fitnesses in the two environments are given by,

$$\begin{aligned} env(e_1, x) &= 5x + 2(1 - x) \\ env(e_2, x) &= x + 2(1 - x). \end{aligned} \quad (7)$$

158 Maximizing the expected long term growth rate results in,

$$x^*(p) = \begin{cases} 0 & \text{for } p \leq 1/4 \text{ (Dormant)} \\ \frac{2}{3}(4p - 1) & \text{for } 1/4 < p < 5/8 \text{ (Bet Hedging)} \\ 1 & \text{for } 5/8 < p \text{ (Germinate).} \end{cases} \quad (8)$$

159 We can therefore identify a bet-hedging region, namely a region in probability space where  
 160 probabilistic switching between the phenotypes occurs. Substituting this result back in the  
 161 growth rates we get,

$$G(E) = \begin{cases} \log(2) & \text{for } p \leq 1/4 \text{ Dormant} \\ (1 - p) \log(8/3) + p \log(8) - H(E) & \text{for } 1/4 < p < 5/8 \text{ Bet Hedging} \\ (1 - p) \log(5) & \text{for } 5/8 < p \text{ Germinate.} \end{cases} \quad (9)$$

162 where  $H(E) = -p \log(p) - (1-p) \log(1-p)$  is the entropy of the random variable  $E$ . Making  
 163 use of a perfectly informative cue the growth rate can be given by,  $G(E|C) = p \log(5) + (1 -$   
 164  $p) \log(2)$ . Hence now the value of the cue is the difference between the growth rate with the  
 165 cue and the one without i.e.  $G(E|C) - G(E)$  illustrated in Fig. 2,

$$\Delta G(E; C) = \begin{cases} p \log(5/2) & \text{for } p \leq 1/4 \text{ Dormant} \\ H(E) + (1 - p) \log(6/8) + p \log(5/8) & \text{for } 1/4 < p < 5/8 \text{ Bet Hedging} \\ (1 - p) \log(2) & \text{for } 5/8 < p \text{ Germinate.} \end{cases} \quad (10)$$

166 Previous studies show that  $\Delta G(E; C)$  peaks within the region of bet-hedging and is bounded  
 167 by the mutual information between the cue and the environment [?]. As in this case where  
 168 the cue is perfect this mutual information is simply the Shannon entropy of the environment  
 169  $H(E)$ .

## 170 2.2 Examples with asymmetry in strategies and environments

171 The environment can vary in time and space. Generally, an organism is adapted only to a  
 172 limited range within an environmental spectrum. Thus including intermediate environmental  
 173 states can better represent relevant environmental variability. For example, the risk of meet-  
 174 ing a predator or the occurrence of certain climatic events can vary along both large or short  
 175 ecological gradients. Drought or extreme flooding generally limit the growth of the seedlings  
 176 while a moderate amount of rain is preferable, and precipitations might vary along with geo-  
 177 graphic distances.

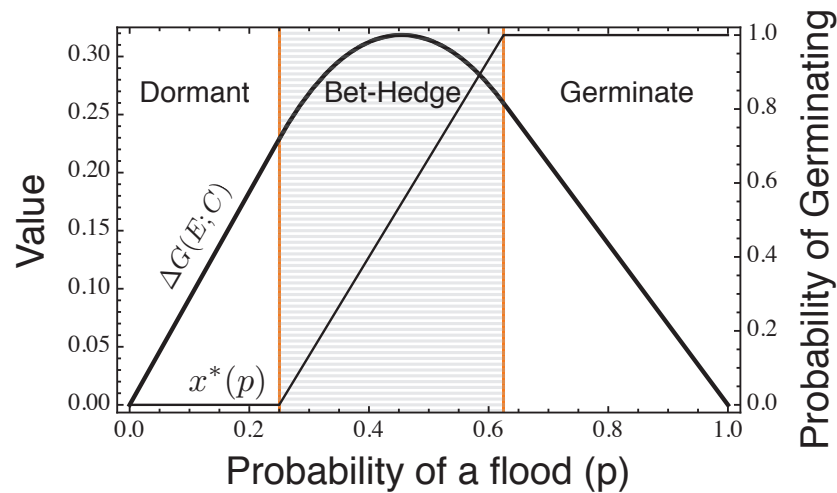

Figure 2: **The value of the cue and the probability to germinate as function of the probability of environmental state  $e_1$ .** The value of the cue  $\Delta G(E; C)$  increases until it peaks within the area of bet-hedging. The bounds of the area of bet-hedging can be calculated analytically Eq. (8). These bounds delineate the transitions in the effective probability of germinating  $x^*(p)$  which shifts from 0 (Dormancy) to 1 (Germination) via a linear increase within the area of bet-hedging.



178 Here we consider the different possible fitness effects of multiple environmental states for  
179 the example of seed dormancy. For simplicity we take into account the possibility that two  
180 consecutive storms occur within one season ( $e_1$ ), only one ( $e_2$ ), or none, leading to a dry year  
181 ( $e_3$ ). These events occur respectively with probabilities  $p^2$ ,  $2(1-p)p$  and  $(1-p)^2$ . In principle,  
182 we can assume a complicated function with two variables instead of only  $p$ . However, as we  
183 show below, even this simple parameterisation, is capable of resulting in intricate bet-hedging  
184 patterns, which is sufficient to make our point.

### 185 **2.2.1 Adaptation to intermediates**

186 Assuming that a single flood might provide the necessary humidity but two consecutive ones  
187 might damage the seedlings we can write down the following interaction matrix,

$$\begin{array}{l} \text{Germinate} \\ \text{Dormant} \end{array} \begin{array}{ccc} e_1 & e_2 & e_3 \\ \left( \begin{array}{ccc} 1 & 4 & 1 \\ 2 & 2 & 2 \end{array} \right), \end{array} \quad (11)$$

188 We have a non-monotonic behaviour of the value of the cue (Appendix, Fig. 3 (a)). However,  
189 the satisfactory probability of playing the ‘Always Germinate’ strategy never materialises.  
190 Instead, the seeds do best remaining dormant close to the extreme conditions and only ger-  
191minating about half the time at most when hedging their bets. The bet-hedging region in this  
192 particular case explores the mixed phenotype space between the pure phenotypes.

### 193 **2.2.2 Adaptation to extremes: Multiplicity of bet-hedging.**

194 Contrary to the previous example, it might also be possible that some plants do better in ex-  
195 tremes rather than in common environmental conditions. For example, annual pioneer plants  
196 can be easily outcompeted by others in intermediate environments ( $e_2$ ). However at environ-  
197 mental extremes ( $e_1$  and  $e_2$ ) their seeds have an advantage.

$$\begin{array}{l} \text{Germinate} \\ \text{Dormant} \end{array} \begin{array}{ccc} e_1 & e_2 & e_3 \\ \left( \begin{array}{ccc} 4 & 1 & 6 \\ 3 & 3 & 3 \end{array} \right), \end{array} \quad (12)$$

198 In such a case, we see that the probability of germinating decreases after a specific threshold  
199 value of  $p$  Fig. 3 (b). The non-linear decrease is up to the pure strategy of dormancy. After a  
200 specific threshold value of  $p$ , it is better to hedge bets with a non-linear increasing probability  
201 of germination reaching the ‘Always Germinate’ extreme. The value of the cue peaks locally  
202 in the bet-hedging regions (Appendix and Fig. 3 (b) bold curve).

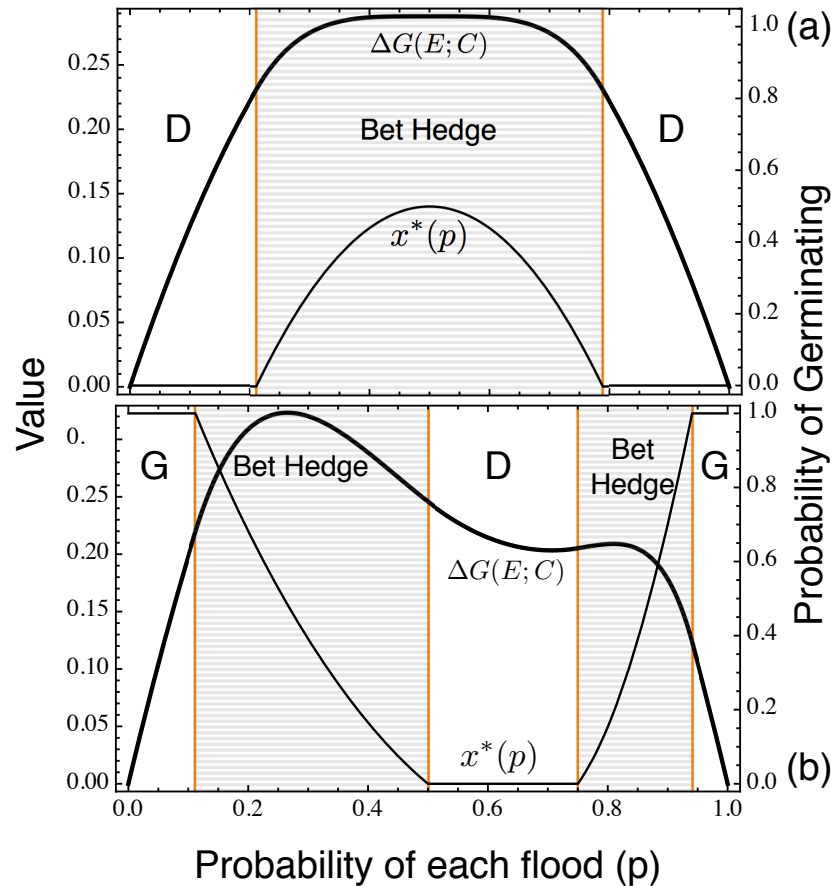

Figure 3: **The value of the cue and the probability of germinating as function of the probability of a single flash flood  $p$ .** Panel (a) is for the example where the intermediate environmental state is favourable for germination. In this case the value of the cue peaks in the area of bet-hedging. The probability of germinating ( $x^*(p)$ ) increases in frequency but just explores the intermediate regime without ever reaching pure Germination. Panel (b) explores the case where germinating in extreme environments is favourable. This case results in two regions of bet-hedging where again the value of the cue ( $\Delta G(E; C)$ ) peaks locally. The probability of germinating goes from 0 (Always Dormant) all the way to the other pure phenotype 1 (Always Germinating) non-linearly hedging its bets along. It changes again in the second region of bet-hedging decreasing to 0 (Always Dormant) where it remains until  $p$  reaches 1. For both the cases, the bounds of the area of bet-hedging can be calculated analytically (ESM). These bounds delineate the transitions in the effective probability of germinating  $x^*(p)$ .

Figure 4: **Bet hedging regions in the probability space for the illustrative examples.** For general probabilities of the three environmental states obeying  $e_1 + e_2 + e_3 = 1$ , we can plot the effective probability of dormancy  $x^*$  for the three illustrative examples. The solid parabolas are the quadratic binomial curves used to describe the examples. For (a) we see a hump in the probability of germinating but the pure Germination strategy is not reached. In (b) the probability of germinating decreases and reaches the pure Dormancy state but then it reduces to pure Germination as the system comes closer to the  $e_1$  vertex.

### 203 **2.3 Environmental gradients in the simplex**

204 The probability distribution considered in the previous examples traces a quadratic binomial  
205 cline. Such parabolic clines are typical of those distributions in which  $e_2$  is an intermediate  
206 environmental state between the others. Thus the distribution of the environments has a direct  
207 impact on the bet-hedging regions. For skewed non-linear distributions, it is possible to have  
208 multiple regions of bet-hedging. We can extend this case to an arbitrary probability distribu-  
209 tion of the environmental states. Assuming that the three states occur with probability  $p_{e_1}$ ,  $p_{e_2}$   
210 and  $p_{e_3}$  where they all sum up to unity ( $p_{e_1} + p_{e_2} + p_{e_3} = 1$ ). Hence now bet-hedging can  
211 occur in a simplex defined by these three probabilities as shown in Figure 4.

212 We explore the evolution of bet-hedging in the simplex of environmental probabilities by  
213 using stochastic simulations for finite populations, in order to relax the assumption of popula-  
214 tions as unbounded and growing at an exponential rate used for the geometric mean approach.  
215 We consider the interaction matrix (11), and performed Wright-Fisher simulations consider-  
216 ing a population size of 1000 individuals, evolved for 1000 generations. Analyzing 100 such  
217 realizations in Fig. 5 (a) we show the probability of expressing a phenotype, germination,  
218 for general environmental distributions. The gradient of the probability of germination was  
219 obtained by interpolating a grid of 10000 points for the whole simplex.

220 In Fig. 5 (right panel) we show further simulations performed for the points marked on  
221 the clines in Fig. 5 (simplex). The clines represent the particular probability distributions  
222 for the environmental states. For instance, the previous examples considered a second-order  
223 binomial indicated by the grey dashed cline, where  $e_1$  occurs with probability  $p^2$  and  $e_3$  with  
224  $(1 - p)^2$ . The second black cline indicates the environmental states distributed according to a  
225 fourth-order binomial. Thus  $e_1$  occurs with probability  $p^4$  while  $e_3$  with probability  $(1 - p)^4$ .  
226 The state  $e_2$  occurs with the complementary probability. Depending on the eccentricity of the  
227 clines we can get one or two regions of bet-hedging. We see the hump shape of the probability  
228 of germinating as predicted by the infinite population size case in Fig. 3 (a) also recovered via

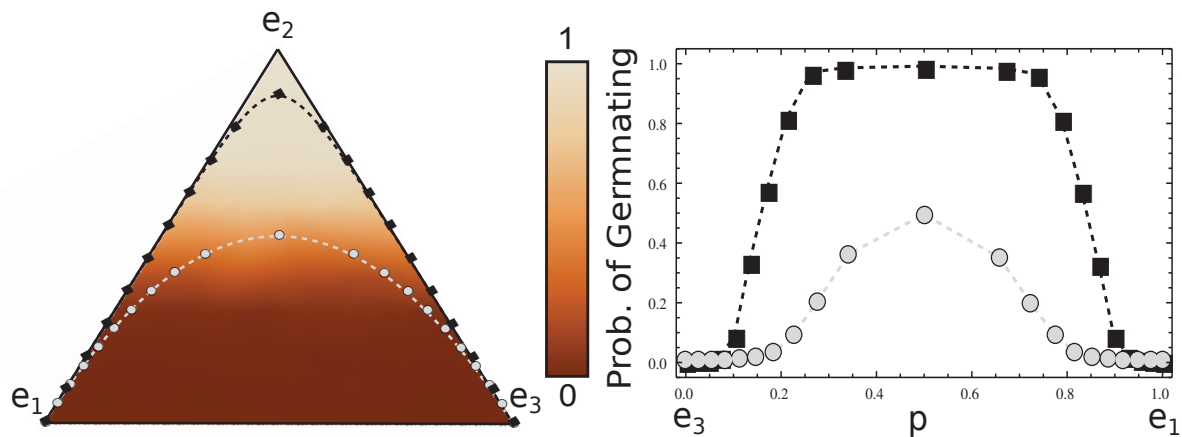

Figure 5: **Stochastic simulations of the mean probability of germinating as a function of particular distribution  $s$  of environmental states.** Wright-Fisher simulations were performed with a population size,  $N$  of 1000. After  $N$  generations the mean probability of germination was calculated. The results were then interpolated to generate the density ternary plot (a). The marks along the clines represent the probability distributions in the simplex space used for the simulations in (b), shown along the clines. Grey dots indicate the second order binomial clines also used for the examples. Black squares indicates instead a fourth order binomial, where the mixed term are assigned to the intermediate state  $e_2$ .

229 stochastic simulations. For the higher-order cline, the simulation results in the ‘Germinating’  
 230 being almost fixed as is the predicted case on the eccentricity of the cline (Fig. 5 simplex).  
 231 Hence not only the interaction matrix but also the particular distribution of the environments  
 232 influences the observed patterns of bet-hedging.

233 Note that we chose to explore parabolic clines for simplicity and to represent environmen-  
 234 tal gradient on a single axis. However, exploring independently the probabilities of different  
 235 environments in the simplex can be relevant for more complex environments or when different  
 236 events interact with each other. We provide some examples in an interactive R notebook on  
 237 [Github](#)

## 238 2.4 The fitness value of information in presence of constraints

In all previous examples, the fitness value of a cue,  $\Delta G(E, C)$ , is calculated with an infor-  
 mation theory approach, despite the non-linear interactions between environment and phe-  
 notypes. Donaldson-Matasci et al. [22] have shown that in the symmetric case, its value  
 is bounded by the mutual information between the distribution of an informative cue  $C$  and

that of the environment  $E$ ,  $I(E; C)$ . Self-information, denoted as  $I(E; E)$ , is equal to  $H(E)$ . Hence, for an entirely informative cue, the fitness value is bound by the entropy  $H(E)$ . Does this boundary always hold even in the asymmetric case? If yes, is it possible to draw a lower boundary? Let us consider environmental state  $e_i$  with  $i$  in  $1 \dots n$  and phenotypes  $\phi_j$  with  $j = 1, \dots, m$ . Previous models [20, 22] explored cases in which the optimal response to each different environmental state  $e_i$  is a phenotype  $\phi_i$ . In this case, a square  $n \times n$  interaction matrix defines the payoff for each phenotype  $\phi_i$  in each different environmental state  $e_i$  [22], occurring with probability  $p_i$ . The optimal matches between the environmental state and phenotype appear along the diagonal, the corresponding gains being  $a_{i,i}$  for every  $i = \{1, 2, \dots, n\}$ .

$$\begin{array}{c|ccccc}
 & e_1 & \dots & e_i & \dots & e_n \\
 \hline
 \phi_1 & a_{1,1} & \dots & a_{1,i} & \dots & a_{1,n} \\
 \vdots & \dots & \dots & \dots & \dots & \dots \\
 \hline
 \phi_n & a_{n,1} & \dots & a_{n,i} & \dots & a_{n,n}
 \end{array} \tag{13}$$

239 However, the assumption of an optimal, accessible phenotype for each environmental state  
 240 might not hold, particularly in the context of the evolution to multiple environments, where a  
 241 single phenotype might represent the best option in response to multiple environmental states.

242 Here we extend the information-theoretic approach developed in Bergstrom et al. [20] to  
 243 estimate the fitness value of a cue but applied to such cases.

To do this, we start by the proportional betting case, in which the best phenotype response for environmental state  $e_i$  provides a payoff  $a_{i,i} = a_i$  while all the other phenotypes are fatal ( $a_{i,j} = 0$  for  $i \neq j$ ) [22], resulting in a diagonal payoff matrix. In general, the best bet-hedging strategy  $\mathbf{x}$ , employing a phenotype  $\phi_j$  with probability  $x_j$ , can be determined by solving the Lagrangian [26] of the long term growth rate with constraint ( $\sum_i x_i = 1$ ):

$$\sum_i p_i \log \sum_j (a_{j,i} x_j) - \lambda (\sum_i x_i - 1). \tag{14}$$

In the proportional betting case, each phenotype is adopted with a probability equal to the occurrence of the environmental state where the payoff is non-zero, denoted as  $a_i$ . Hence, in the symmetric case, when for each environmental state, a different optimal phenotype exists:

$$G(E)_n = \sum_{i=1}^n p_i \log p_i a_i = \sum_{i=1}^n p_i \log a_i - H(E). \tag{15}$$

244 We study the asymmetric case with the number of environments  $n$  larger than the number  
 245 of phenotypes  $m$ . To this aim, we can extend a diagonal payoff matrix  $m \times m$  to include  
 246 additional columns representing the payoffs of the different phenotypes to environments  $j >$

247  $m$ . Hence, we investigate payoff matrices for which  $a_{i,j} \neq 0$  only when  $i = j$  or for  $a_{m,j}$  and  
 248  $j \geq m$ . We write  $a_{i,i} = a_i$  for  $i < m$ , and  $a_{m,i} = b_i$  for  $i \geq m$ . We can write:

$$\begin{aligned}
 G(E)_m &= \sum_{i=1}^n p_i \log \left( \sum_{j=1}^m a_{j,i} x_j \right) = \\
 &= \sum_{i=1}^{m-1} p_i \log \left( \sum_{j=1}^m a_{j,i} x_j \right) + \sum_{i=m}^n p_i \log \left( \sum_j a_{j,i} x_j \right) = \\
 &= \sum_{i=1}^{m-1} p_i \log (a_i x_i) + \sum_{i=m}^n p_i \log (a_{m,i} x_m) = \\
 &= \sum_{i=1}^{m-1} p_i \log x_i + \sum_{i=m}^n p_i \log x_m + \sum_{i=1}^n p_i \log a_i \tag{16}
 \end{aligned}$$

249 Which gives a maximum at

$$\begin{aligned}
 G(E)_m &= \sum_{i=1}^{m-1} p_i \log p_i + \sum_{i=m}^n p_i \log \sum_{j=m}^n p_j + \\
 &+ \sum_{i=1}^{m-1} p_i \log a_i + \sum_{i=1}^{m-1} p_i \log b_i \tag{17}
 \end{aligned}$$

$$\tag{18}$$

250 Therefore:

$$\begin{aligned}
 &G(E)_m - G(E)_n = \\
 &= \sum_i^{m-1} p_i \log p_i + \sum_{i=m}^n p_i \log \left( \sum_{j=m}^n p_j \right) - \sum_i^n p_i \log p_i - \sum_{i=m}^n p_i \log a_i/b_i = \\
 &= \sum_i^{m-1} p_i \log \frac{p_i}{p_i} + \sum_{i=m}^n p_i \log \frac{\sum_{j=m}^n p_j}{p_i} - \sum_{i=m}^n p_i \log a_i/b_i \tag{19}
 \end{aligned}$$

251 When the cue  $C$  provides full information about the environment, the right phenotype will be  
 252 chosen in each case, with payoff  $a_i$ , except for environmental states  $i > m$ , when one strategy  
 253 cannot develop phenotype  $\phi_i$ . Therefore just as in the symmetric diagonal case,  $G(E|C)_n =$   
 254  $\sum_{i=1}^n p_i \log a_i$ , while  $G(E|C)_m = G(E|C)_n - \sum_{i=m}^n p_i \log a_i/b_i$ , and

$$\Delta G(E; C)_n - \Delta G(E; C)_m = \sum_{i=m}^n p_i \log \frac{\sum_{j=m}^n p_j}{p_i} \tag{20}$$

255 This is the Kulback-Leibler divergence between the optimal strategy when all phenotypes  
 256  $1 \dots n$  are available, and used with frequency  $p_i$ , and when no optimal specific types for en-  
 257 vironments  $m \dots n$  are available, and for all those phenotype  $m$  is used with the sum fre-  
 258 quency  $\sum_m^n p_i$ . The expression is independent of the payoffs and always positive, confirming

259 that the mutual information bound for the fitness value of an informative cue exists for the  
260 asymmetric case as well. Furthermore, this quantity is part of the conditional entropy of the  
261 environment given a fully informative cue, reflecting the residual uncertainty of a cue unable  
262 to discriminate between environmental states for which a single phenotype is optimal. Since  
263  $I(E_n|C) - H(E|C_{i \geq m}) = I(E_m|C)$ , this indicates that in the presence of a generalist phe-  
264 notype, the fitness of an informative cue is further decreased by the amount of information  
265 necessary to differentiate between the equally paying environmental states. The decrease is  
266 equal to the mutual information of the environment with a cue informative only on environ-  
267 mental states for which different phenotypes are optimal.

268 These results, shown for the proportional bet-hedging case for simplicity, are also valid  
269 in the general case of non-completely specific phenotypes, in which the payoff of the least  
270 advantageous phenotype-environmental state combinations may provide non-zero payoffs. In  
271 fact, following Donaldson-Matasci et al., 2008 [37], note that the fitness profile of these phe-  
272 notypes in different environments can be represented as a mixture of specialized phenotypes  
273 with zero-payoffs for disadvantageous phenotype-environmental state combinations, i.e. as  
274 in the proportional bet-hedging case. Thus, also bet-hedging strategies employing these non-  
275 completely specialized phenotypes can be seen in turn as mixtures of completely specialized  
276 phenotypes. Hence, even in the more complex cases, we see that the value of the cue is bound  
277 by the mutual information between the cue and the environment (Fig. 6 and Appendix). Since  
278 we are dealing with perfect cues, this mutual information is simply the entropy of the environ-  
279 ment  $H(E) = -\sum_{i=1}^3 p_{e_i} \log p_{e_i}$  (equal to  $H(E_m)$  (yellow surface) in the asymmetric case).

280

## 281 **2.5 Limits of bet-hedging in increasingly complex environments**

So far we focused on cases in which the number of potential phenotypes  $m$  is lower than that  
of environmental states  $n$ , i.e. payoffs matrices with  $m < n$ . We now describe why these  
cases are relevant and likely universal in nature, by showing that even when more potential  
phenotypes are available and  $m > n$ , evolution leads to organisms using only a reduced set of  
phenotypes. Note that non-trivial instances of  $m > n$  matrices correspond to cases in which  
at least a phenotype provides a non-zero payoff for multiple environmental states, thus of-  
fering an opportunity for conservative bet-hedging. An extreme case is that of a phenotype  
that provides the same payoff for all environmental states. An alternative case is that of an  
intermediate phenotype that can be adopted in spite of two or more optimal phenotypes for  
specific environmental states. Hence, our question corresponds to investigating when conser-  
vative bet-hedging strategies evolve over diversifying bet-hedging ones, i.e. when a matrix  
 $m \times n$  reduces effectively to a matrix with a smaller number of rows/phenotypes. To do this

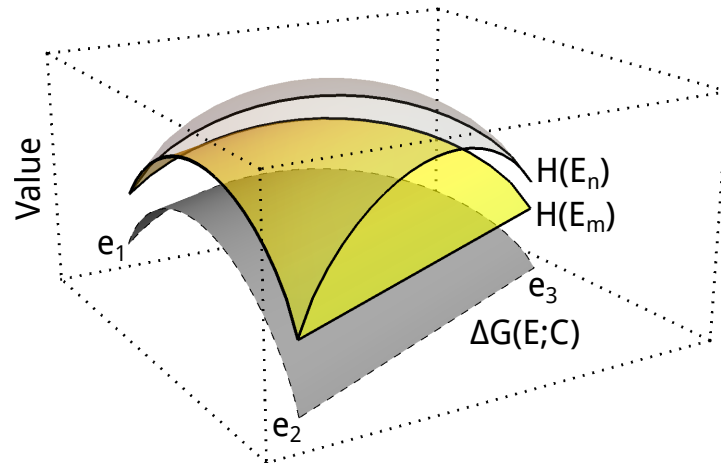

Figure 6: **Boundedness of the value of information by the entropy of the environment.** Considering all possible distributions, the parameter space of the possible environmental states is then defined on a simplex given by  $p_1$ ,  $p_2$  and  $p_3$  where the vertices are the pure environmental states  $e_1$ ,  $e_2$  and  $e_3$  respectively. The value of the cue  $\Delta G(E; C)$  over such a space (gray triangle) is bounded by the mutual information between the environment and the cue (transparent triangle), that in the asymmetric case decreases to  $H(E_m)$  (yellow surface). We demonstrate this for the most complicated case described by the interaction matrix (12).



we examine a matrix:

$$\begin{array}{c|cccccc}
 & e_1 & \dots & e_i & \dots & e_n \\
 \hline
 \phi_1 & a_{1,1} & \dots & a_{1,i} & \dots & a_{1,n} \\
 \vdots & \dots & \dots & \dots & \dots & \dots \\
 \hline
 \phi_n & a_{n,1} & \dots & a_{n,i} & \dots & a_{n,n} \\
 \hline
 \phi_{n+1} & b_{n+1,1} & \dots & b_{n+1,i} & \dots & b_{n+1,n} \\
 \vdots & \dots & \dots & \dots & \dots & \dots \\
 \hline
 \phi_m & b_{m,1} & \dots & b_{m,i} & \dots & b_{m,n} \\
 \hline
 \end{array} \tag{21}$$

where for each environmental state  $i$  we arranged the phenotype providing the highest payoff  $a_{i,i}$  as phenotype  $i$ . Further potential phenotypes are denoted as  $\phi_j$  with  $j > n$ , and by construction, payoffs  $b_{j,i} \leq a_{i,i}$ . Our previous analysis presents a simple method for investigating under which environmental circumstances such asymmetries might evolve. Consider a strategy  $G(E)_m$  adopting a generalist phenotype  $\phi_j$  with payoffs  $b_{j,k} > a_{i,k}$  rather than the specialized phenotypes  $\phi_k$  with payoffs  $a_{k,k}$  for  $k > i$ , as strategy  $G(E)_n$ . By recalling Eq. (19)-(20), we can see that  $G(E)_m$  is advantageous if

$$G(E)_m - G(E)_n = H(E|C_{i \geq m}) - \sum_{i=m}^n p_i \log a_i/b_i > 0 \tag{22}$$

282 indicating that the maximum decrease in payoff of the generalist strategy is bound by the  
 283 entropy of the system that is *removed* by adopting it. This simple relationship helps us to  
 284 illustrate the instances in which generalist phenotypes are employed. To do this, we devise an  
 285 example in which specialized, intermediate and generalist phenotypes evolve, following the  
 286 general payoff matrix described in Eq. (21). We consider  $n$  equally frequent environmental  
 287 states, subdivided in  $n_k$  groups of size  $k$ , biologically representing environmental states with  
 288 similar features. Intermediate phenotypes allow to respond to any of the similar environmental  
 289 states, but with maximum payoff lower than the specialized phenotypes, i.e. for each of the  
 290  $n_k$  groups, an intermediate phenotype  $\phi_{i \geq n}$  exists, providing payoff  $b_{n_k,i}$  as in Eq.21. Also, a  
 291 perfect generalist phenotype exists, providing the same payoff  $c$  in all environmental states.

292 By manipulating the number of environmental states, while keeping constant the size of  
 293 the groups, the total entropy ( $H(E_n)$ ) of the system increases, while the entropy within the  
 294 groups ( $H(E_k)$ ) is not affected (Fig.7a). Furthermore, the conditional entropy of the envi-  
 295 ronmental states with the same intermediate phenotype is unaffected; intermediate phenotypes  
 296 are not favoured over specialized ones as the total entropy increases. Whether intermediate  
 297 phenotypes evolve or not depends exclusively on the ratio of the payoffs. On the other hand,  
 298 generalist phenotypes (i.e. conservative bet-hedging strategies) eventually become advanta-  
 299 geous as entropy increases.

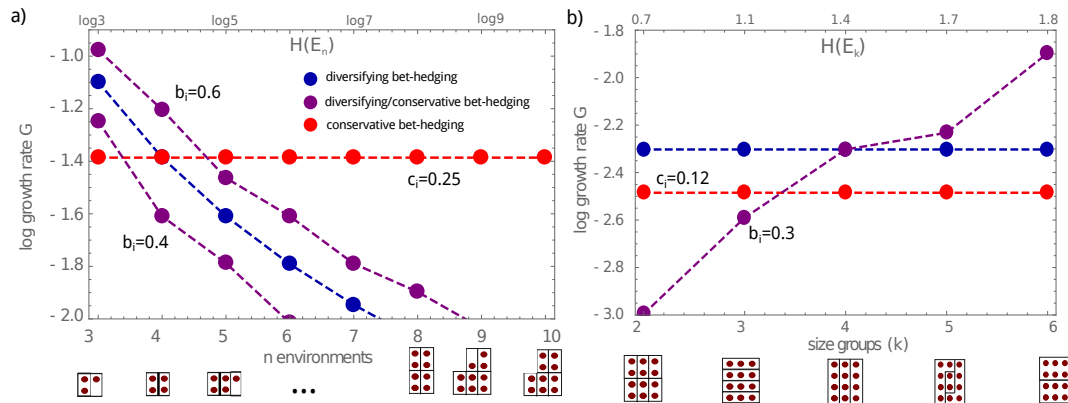

**Figure 7: Limits of bet-hedging in increasingly complex environments.** Long term log-growth rates for different bet-hedging strategies for environments with an increasing number of uniformly distributed environmental states (a) or an increasing size of the partitions of environmental states for which an intermediate generalist phenotype exist. These partitions are represented under the plots with environmental states (brown circles) grouped on the basis of a potential suitable generalist phenotype (represented as black rectangles). We assume a square environment payoff matrix in which the optimal payoff for any environmental state give payoff 1 ( $a_{i,i} = 1$ ) and 0 in all non matching cases ( and  $a_{i \neq j} = 0$ ), leading to a fully diversifying bet-hedging strategy (blue dots). We also show the log-growth rate for a fully generalist strategy with fixed payoff in all environmental states  $c$  (red dots) and partially bet-hedging strategies that instead of hedging their bets on the optimal phenotypes, they hedge more generalist phenotypes matching the different partitions, providing payoff  $b$  in those and 0 in the rest. a) Partition size is fixed to two.

300 By manipulating the size of the groups, only the conditional entropy,  $H(E|C_{i \geq m})$  (here  
301  $H(E_k)$ ), of the groups increases (Fig.7b). In this case, the growth rates of pure diversify-  
302 ing and conservative bet-hedging remain constant. However, strategies bet-hedging between  
303 intermediate phenotypes become more advantageous as  $H(E_k)$  increases.

304 To summarize, in both cases, strategies employing generalist phenotypes evolve as the un-  
305 certainty of the system increases. In turn, the growth rate and the fitness value of information  
306 can be described using asymmetric matrices.

### 307 **3 Discussion**

308 Organisms facing complex and variable environments often evolve complex adaptive mecha-  
309 nisms to acquire information about the environment in the form of informative cues. What is  
310 the fitness values of these cues? What is the fitness value of these complex adaptations? An-  
311 swers to these vital questions remain elusive in natural populations. A significant advantage  
312 of information theory is that it provides a theoretical boundary to these quantities, and could  
313 aid quantify the fitness benefits based on the uncertainty of the environment, thus informing  
314 empirical as well as theoretical research. However, its application has been so far limited [21],  
315 possibly because the models usually focused on simple systems for tractability.

316 Natural systems, on the other hand, can be exceedingly complex. Organisms have so-  
317 phisticated bet-hedging strategies to deal with environmental uncertainty without relying on  
318 informative cues. In these cases, organisms do not need to respond flexibly to the environment.  
319 Spreading the risk of facing adverse environmental conditions by betting on diverse or inter-  
320 mediate phenotypes can work. This mechanism can explain several biological phenomena,  
321 from intergenerational phenotypic stochastic switching to animal personalities [38], although  
322 hard evidence for bet-hedging in the animal world has been so far elusive [18]. While it is  
323 possible to study bet-hedging experimentally in microbes [6, 7], the evolutionary mechanisms  
324 underpinning the use of informative cues is still elusive. Different levels of environmental un-  
325 predictability present along environmental or geographical clines exacerbate the complexity  
326 of bet-hedging and informative cues. Natural populations could then potentially display non-  
327 trivial bet-hedging patterns. We illustrate this through the example of organisms adapted only  
328 to intermediate states of environmental gradients such as temperature or salinity. Intermedi-  
329 ate levels of such gradients are taken as discrete environmental states. For example, seasonal  
330 plants adapted to intermediate water levels: the total absence of flash floods might lead to a  
331 harsh dry year, as well as two consecutive floods could damage the growth of seedlings. In  
332 this example (Fig. 3) we show two cases in which bet-hedging occurs only within confined  
333 regions of the parameter space, i.e. regions with intermediate probabilities of rain, surrounded

334 by more stable regions where only one phenotype is adopted. These hypothetical clines, de-  
335 scribed in Figures 5, could be geographic transects going from environmental extremes such  
336 as from desert to rain-forests. For example, dormancy is advantageous in response to mul-  
337 tiple extreme events (e.g. drought, fire [39], extreme cold) and occurring from alpine [40]  
338 to wetland [41] and desert plants. We suggest that such studies might highlight interesting  
339 patterns of bet-hedging along environmental gradients, primarily if a species exist across such  
340 environmental transect [42].

341 We show that universally, the fitness benefit of an informative cue is bound by the mutual  
342 information between the cue and the environment. Besides, when the variety of phenotypes  
343 that can be adopted by phenotypic switching strategies and plasticity is limited, the maximum  
344 potential fitness benefit of an informative cue is further reduced. Precisely, the reduction is due  
345 to the conditional entropy between the environment and a cue informative about the inacces-  
346 sible phenotypes, i.e.  $H(E|C_{i \geq m})$ , where a single phenotype has the highest environmental  
347 states,  $i \geq m$ . This result implies that plasticity is less advantageous when physiological  
348 constraints limit the phenotypes that can be adopted. This result is intriguing because counter-  
349 intuitively the number of phenotypes that can be adopted can decrease - and in-turn, the fit-  
350 ness benefit of information can decrease, rather than increase - as environmental uncertainty  
351 increases. In practice, under high environmental variation, an organism might decrease the  
352 amount of explored phenotypes explored through bet-hedging, further reducing the benefit of  
353 relying on informative cues.

354 Note that information theory provides insights into many possible scenarios in which the  
355 relationship between bet-hedging and cues is complicated. For example, when cues are un-  
356 reliable and idiosyncratic (i.e. each individual - a different cue) relying on cues can be used  
357 as another means towards bet-hedging [19]. Hence, we advocate that the collection of more  
358 empirical data on the environmental uncertainty of species that live on environmental gradi-  
359 ents might provide exciting insights into bet-hedging, and that would allow a quantification  
360 of the fitness benefits of informative cues using the framework described above. To this aim,  
361 we showed in the examples and the accompanying R notebook ([Github](#)) how such data could  
362 be analyzed. We emphasize that this approach is general, and we used parabolic environmen-  
363 tal clines only as an example. Conversely, the approach applies to cases in which multiple  
364 environmental states and environmental factors could affect the fitness of an organism. For  
365 instance, density dependence and competition are essential predictors of bet-hedging [43], as  
366 in advancing pioneer plants, in which dormancy can evolve in response to the competition  
367 with plants adapted to prevailing environmental conditions. Most importantly, this approach  
368 provides theoretical upper limits for the fitness advantage of specific cues or adaptive mech-  
369 anism even in the absence of precise knowledge of fitness, a task that is otherwise hard to

370 achieve. To illustrate this, we look at a hypothetical case inspired by the marine midge *Clunio*  
371 *marinus* (Chironomidae, Diptera). *Clunio* is adapted to one of the most complex environ-  
372 ments on earth, the intertidal zone of seacoasts. Synchronising the adult emergence time to  
373 multiple environmental cycles of tidal, diurnal and lunar cycles, the marine midge, has suc-  
374 cessfully adapted in processing complex informative cues [44]. Using cues, adults emerge  
375 when conditions are favourable. Assuming a narrow window of opportunity for successful  
376 reproduction, we provide a theoretical upper boundary for the fitness advantage of this trait  
377 equivalent to about 0.31 bits (see [Github](#) for additional explanation and examples). Providing  
378 a metric in bits, valid across species, a thorough quantification of environmental variability in  
379 different species along environmental gradients could allow for a clearer understanding of the  
380 ecological conditions promoting plasticity and the usage of informative cues.

381 In conclusion, we have extended the study of bet-hedging to asymmetric cases where phe-  
382 notypes are scarcer than the number of different environmental states. We show that in realistic  
383 conditions, the patterns of bet-hedging might be more complicated than previously expected.  
384 The results could potentially help clarify some of the mixed results of empirical observations  
385 [18], and better describe the evolution of bet-hedging along complex environmental gradients.  
386 However, even the most complicated cases, still obey the limit on the fitness value of a cue  
387 imposed by the mutual information.

## 388 **Acknowledgments**

389 CSG acknowledges Arne Traulsen for helpful discussions and funding from the New Zealand  
390 Institute for Advanced Study, Massey University where part of the work was done. All authors  
391 acknowledge funding from the Max Planck Society.

## 392 **References**

- 393 [1] Hasson O. Cheating signals. *Journal of Theoretical Biology*. 1994;167(3):223–238.
- 394 [2] Maynard Smith J, Harper D. *Animal Signals*. Oxford University Press; 2003.
- 395 [3] Fusco G, Minelli A. Phenotypic plasticity in development and evolution: facts and  
396 concepts. *Philosophical Transactions of the Royal Society B: Biological Sciences*.  
397 2010;365(1540):547–556.

- 398 [4] Kokko H, Chaturvedi A, Croll D, Fischer MC, Guillaume F, Karrenberg S, et al.  
399 Can Evolution Supply What Ecology Demands? *Trends in Ecology & Evolution*.  
400 2017;32(3):187–197.
- 401 [5] Levins R. Theory of Fitness in a Heterogeneous Environment. I. The Fitness Set and  
402 Adaptive Function. *The American Naturalist*. 1962;96(891):361–373.
- 403 [6] Beaumont HJE, Gallie J, Kost C, Ferguson GC, Rainey PB. Experimental evolution of  
404 bet hedging. *Nature*. 2009;462:90–93.
- 405 [7] Ratcliff WC, Denison RF. Bacterial persistence and bet hedging in *Sinorhizobium*  
406 *meliloti*. *Communicative & integrative biology*. 2011;4(1):98–100.
- 407 [8] Starrfelt J, Kokko H. Bet-hedging—a triple trade-off between means, variances and  
408 correlations. *Biological Reviews*. 2012;87(3):742–755.
- 409 [9] Soll DR, Kraft B. A comparison of high frequency switching in the yeast *Candida albi-*  
410 *cans* and the slime mold *Dictyostelium discoideum*. *Developmental Genetics*. 1988;9(4-  
411 5):615–628.
- 412 [10] Moxon ER, Rainey PB, Nowak MA, Lenski RE. Adaptive evolution of highly mutable  
413 loci in pathogenic bacteria. *Current Biology*. 1994;4(1):24–33.
- 414 [11] Balaban NQ, Merrin J, Chait R, Kowalik L, Leibler S. Bacterial Persistence as a Pheno-  
415 typic Switch. *Science, New Series*. 2004;305(5690):1622–1625.
- 416 [12] Cohen D. Optimizing reproduction in a randomly varying environment. *Bioorganic*  
417 *Chemistry*. 1966;12(1):119–129.
- 418 [13] Slatkin M. Hedging one’s evolutionary bets. *Nature*. 1974;250:704–705.
- 419 [14] Bull JJ. Evolution of Phenotypic Variance. *Evolution*. 1987;41(2):303–315.
- 420 [15] Seger J, Brockmann HJ. What is bet-hedging? Oxford University Press; 1987. .
- 421 [16] King OD, Masel J. The evolution of bet-hedging adaptations to rare scenarios. *Theoret-*  
422 *ical Population Biology*. 2007 Dec;72(4):560–575.
- 423 [17] Childs DZ, Metcalf CJE, Rees M. Evolutionary bet-hedging in the real world: empir-  
424 ical evidence and challenges revealed by plants. *Proceedings of the Royal Society B:*  
425 *Biological Sciences*. 2010;277(1697):3055–3064.

- 426 [18] Simons AM. Modes of response to environmental change and the elusive empirical  
427 evidence for bet hedging. *Proceedings of the Royal Society B: Biological Sciences*.  
428 2011;278(1712):1601–1609.
- 429 [19] Donaldson-Matasci MC, Bergstrom CT, Lachmann M. When Unreliable Cues Are Good  
430 Enough. *The American Naturalist*. 2013;182(3):313–327.
- 431 [20] Bergstrom CT, Lachmann M. Shannon information and biological fitness. In: 2004  
432 IEEE Information Theory Workshop. IEEE; 2004. p. 50–54.
- 433 [21] van Baalen M. Biological information: why we need a good measure and the challenges  
434 ahead. *Interface focus*. 2013;3(6):20130030.
- 435 [22] Donaldson-Matasci MC, Bergstrom CT, Lachmann M. The fitness value of information.  
436 *OIKOS*. 2010;119(2):219–230.
- 437 [23] Gould JP. Risk, stochastic preference, and the value of information. *Journal of Economic*  
438 *Theory*. 1974;8(1):64–84.
- 439 [24] Stephens DW. Variance and the value of information. *American Naturalist*.  
440 1989;134(1):128–140.
- 441 [25] Shannon CE. A Mathematical Theory of Communication. *The Bell System Technical*  
442 *Journal*. 1948;27:379–423.
- 443 [26] Cover TM, Thomas JA. *Elements of Information Theory*. John Wiley & Sons, Inc.;  
444 1991.
- 445 [27] Grafen A. Formal Darwinism, the individual-as-maximizing-agent analogy and bet-  
446 hedging. *Proceedings of the Royal Society B: Biological Sciences*. 1999;266(1421):799.
- 447 [28] Grafen A. Developments of the Price equation and natural selection under uncertainty.  
448 *Proceedings of the Royal Society B: Biological Sciences*. 2000;267(1449):1223–1227.
- 449 [29] Gillespie JH. *The Causes of Molecular Evolution*. Oxford University Press; 1991.
- 450 [30] Orr HA. Absolute fitness, relative fitness and utility. *Evolution*. 2007;61(12):2997–3000.
- 451 [31] Orr HA. Fitness and its role in evolutionary genetics. *Nature Reviews Genetics*.  
452 2009;10:531–539.
- 453 [32] Dempster ER. Maintenance of genetic heterogeneity. *Cold Spring Harb Symp Quant*  
454 *Biol*. 1955;20:25–32.



- 455 [33] Haldane J, Jayakar SD. Polymorphism due to selection of varying direction. *Journal of*  
456 *Genetics*. 1963;58(2):237–242.
- 457 [34] Gillespie JH. Natural selection with varying selection coefficients—a haploid model.  
458 *Genetical Research*. 1973;.
- 459 [35] Lewontin RC, Cohen D. On population growth in a randomly varying environment.  
460 *Proceedings of the National Academy of Sciences USA*. 1969;62(4):1056–1060.
- 461 [36] Donaldson-Matasci MC, Bergstrom CT, Lachmann M. The fitness value of information.  
462 *OIKOS*. 2010;119(2):219–230.
- 463 [37] Donaldson-Matasci MC, Lachmann M, Bergstrom CT. Phenotypic diversity as an adap-  
464 *tation to environmental uncertainty*. *Evolutionary Ecology Research*. 2008;10(4):493–  
465 515.
- 466 [38] Wolf M, Weissing FJ. An explanatory framework for adaptive personality differ-  
467 *ences*. *Philosophical Transactions of the Royal Society B: Biological Sciences*.  
468 2010;365(1560):3959–3968.
- 469 [39] Moreira B, Pausas JG. Tanned or Burned: The Role of Fire in Shaping Physical Seed  
470 *Dormancy*. *PLoS ONE*. 2012;7(12):e51523.
- 471 [40] Kaye TN. Seed dormancy in high elevation plants: implications for ecology and restora-  
472 *tion*. In: Kaye TN, Liston A, Love RN, Luoma DL, Meinke RJ, Wilson MV, editors.  
473 *Conservation and Management of Native Plants and Fungi*. Plant Society of Oregon,  
474 *Corvallis, Oregon*; 1997. .
- 475 [41] Xiao C, Xing W, Liu G. Seed germination of 14 wetland species in response to duration  
476 *of cold-wet stratification and outdoor burial depth*. *Aquatic Biology*. 2010;11(2):169–  
477 177.
- 478 [42] Wagmann K, Hautekèete NC, Piquot Y, Meunier C, Schmitt SE, Van Dijk H. Seed  
479 *dormancy distribution: explanatory ecological factors*. *Annals of Botany*. 2012  
480 *Nov*;110(6):1205–1219.
- 481 [43] Gremer JR, Venable DL. Bet hedging in desert winter annual plants: optimal germination  
482 *strategies in a variable environment*. *Ecology Letters*. 2014;17(3):380–387.
- 483 [44] Kaiser TS, Neumann D, Heckel DG. Timing the tides: Genetic control of diurnal and  
484 *lunar emergence times is correlated in the marine midge Clunio marinus*. *BMC Genetics*.  
485 2011;12(1):49.



Figure A.1: **Average fitnesses of the strategies Germinate and Dormant as a function of the probability of a single flood event  $p$ .** Panel (a) describes the situation where the intermediate environmental state is the only one favourable for germination. However knowing the exact state of the environment can lead to an increase in fitness given by  $F(E|C)$ . Hence the fitness benefit due to the cue,  $\Delta F(E|C)$ , is given by the shaded area. Panel (b) describes the case where the optimal gains for germinating are obtained in extreme environments. For this particular example the we get two internal fixed points given by  $\{1/2, 3/4\}$ . Below and above these fixed points it is best to germinate but in between it pays to stay dormant. Again for a perfect cue the fitness is given by increases by  $\Delta F(E; C)$  to  $F(E|C)$ .

- 486 [45] Hauert C, Michor F, Nowak MA, Doebeli M. Synergy and discounting of cooperation in  
487 social dilemmas. *Journal of Theoretical Biology*. 2006;239:195–202.
- 488 [46] Gokhale CS, Traulsen A. Evolutionary games in the multiverse. *Proceedings of the*  
489 *National Academy of Sciences USA*. 2010;107:5500–5504.

## 490 **A Examples with asymmetries in strategies and environments**

491 **Adaptation to intermediate environments.** If the difference in benefits in the three environ-  
492 nments switch their signs then this satisfies a necessary condition for getting two internal fixed  
493 points [45, 46]. Herein we set up an example where we do get two internal fixed points for the  
494 three environment case. Here

$$\begin{array}{l} \text{Germinate} \\ \text{Dormant} \end{array} \begin{pmatrix} e_1 & e_3 & e_2 \\ 1 & 4 & 1 \\ 2 & 2 & 2 \end{pmatrix}, \quad (\text{A.1})$$

495 The fitnesses of the two phenotypes are,

$$f_G = p^2 + 8p(1 - p) + 1(1 - p)^2 \quad (\text{A.2})$$

$$f_D = 2p^2 + 4p(1 - p) + 2(1 - p)^2 \quad (\text{A.3})$$

496 In the absence of any external information about the environment the single generational ex-  
497 pected fitness is  $F(E) = \max[f_G, f_D]$ . However with a perfectly informative cue  $C$ , the  
498 single generational expected fitness,  $F(E|C) = 2p^2 + 8p(1 - p) + 2(1 - p)^2$ . We look at  
499 the difference between the fitness with perfect information and the strategy of probabilistic

500 allocation according to the game theoretic outcome. The value of information is measured as  
 501 the difference between the fitness with the cue and without the cue  $\Delta F(E; C)$  (Figure A.1).

502 The frequency with which seeds germinate is assumed to be  $x$  while they remain dormant  
 503 with a complementary probability. The average fitnesses of the population in the different  
 504 environments is then given by,

$$\begin{aligned} env(1, x) &= x + 2(1 - x) \\ env(2, x) &= 4x + 2(1 - x) \\ env(3, x) &= x + 2(1 - x) \end{aligned} \quad (\text{A.4})$$

505 Maximising the long term population growth rate means maximising,

$$g(x) = p^2 \log[env(1, x)] + 2p(1 - p) \log[env(2, x)] + (1 - p)^2 \log[env(3, x)] \quad (\text{A.5})$$

506 The maxima of this function appears when  $x_{max} = -1 + 6p - 6p^2$ . Restricting to values of  $p$   
 507 which give us results for  $x$  between 0 and 1 we get,

$$x^*(p) = \begin{cases} 0 & \text{for } p \leq \frac{1}{6} (3 - \sqrt{3}) \text{ or } p \geq \frac{1}{6} (3 + \sqrt{3}), \text{ Dormant} \\ x_{max} & \text{otherwise, Bet Hedging} \\ 1 & \text{never, Germinate.} \end{cases} \quad (\text{A.6})$$

508 The growth rate without the cue therefore is given by,

$$G(E) = \begin{cases} \log(2) & \text{for } p \leq \frac{1}{6} (3 - \sqrt{3}) \text{ or } p \geq \frac{1}{6} (3 + \sqrt{3}) \\ -H(E) + p^2 \log\left(\frac{3(1-2p(1-p))}{p^2}\right) & \\ +2p(1-p) \log(6) & \\ +(1-p)^2 \log\left(\frac{3(1-2p(1-p))}{(1-p)^2}\right) & \text{otherwise} \\ 2p(1-p) \log(4) & \text{never.} \end{cases} \quad (\text{A.7})$$

509 If the cue provides perfect information then the long term fitness value is,  $G(E|C) = p^2 \log(2) +$   
 510  $2p(1-p) \log(4) + (1-p)^2 \log(2)$ . The gain in fitness due to knowing the environment, i.e.  
 511 the fitness value of information is therefore given by,  $\Delta G(E; C) = G(E|C) - G(E)$ ,

$$\Delta G(E; C) = \begin{cases} 2p(1-p) \log 2 & \text{for } p \leq \frac{1}{6} (3 - \sqrt{3}) \text{ or } p \geq \frac{1}{6} (3 + \sqrt{3}) \\ H(E) + p^2 \log\left(\frac{2p^2}{3(p^2+(1-p)^2)}\right) & \\ -2p(1-p) \log(3/2) & \\ +(1-p)^2 \log\left(\frac{2(1-p)^2}{3(p^2+(1-p)^2)}\right) & \text{otherwise} \\ (p^2 + (1-p)^2) \log(2) & \text{never.} \end{cases} \quad (\text{A.8})$$

512 The bet-hedging region in this particular case explores the mixed phenotype space between the  
 513 pure phenotypes. Therefore in the bet-hedging region such “exploratory bet-hedging” occurs  
 514 that would never be affordable as a pure strategy.

515 **Adaptation to extremes: Multiplicity of bet-hedging.** Contrary to the previous example  
 516 now we consider seeds which perform better germinating in extreme environments.

$$\begin{array}{l} \text{Germinate} \\ \text{Dormant} \end{array} \begin{array}{ccc} e_1 & e_2 & e_3 \\ \left( \begin{array}{ccc} 4 & 1 & 6 \\ 3 & 3 & 3 \end{array} \right), \end{array} \quad (\text{A.9})$$

517 Equating the average fitness of the two phenotypes which are given by,

$$f_G = 4p^2 + 2p(1-p) + 6(1-p)^2 \quad (\text{A.10})$$

$$f_D = 3p^2 + 6p(1-p) + 3(1-p)^2, \quad (\text{A.11})$$

518 we get two fixed points denoted by  $p^* = \{1/2, 3/4\}$ . Thus depending on  $p$  the best phenotype,  
 519 according to the fitnesses, switches from germination to dormancy to germination again.

520 However if the cue provides perfect information about the environment then the fitness  
 521 conditioned upon the cue is  $F(E|C) = 4p^2 + 6p(1-p) + 6(1-p)^2$ . The value of the  
 522 information received due to the cue is the difference between the fitness with the cue and  
 523 without the cue  $\Delta F(E; C)$  (Figure A.1). Assuming that the seeds germinate with probability  
 524  $x$  and stay dormant with probability  $1-x$ , the average fitnesses of the population in the  
 525 different environments are then given by,

$$\begin{aligned} env(1, x) &= 4x + 3(1-x) \\ env(2, x) &= x + 3(1-x) \\ env(3, x) &= 6x + 3(1-x) \end{aligned} \quad (\text{A.12})$$

526 Maximising the long term population growth rate, we get

$$g(x) = p^2 \log[env(1, x)] + 2p(1-p) \log[env(2, x)] + (1-p)^2 \log[env(3, x)] \quad (\text{A.13})$$

527 whose maxima is given by,

528  $x_{max}^\pm = \frac{1}{4} \left( -3 - 10p + 14p^2 \pm \sqrt{196p^4 - 280p^3 + 208p^2 - 180p + 81} \right)$ . While one of the  
 529 solutions is outside the range of  $x$  ( $0 \leq x \leq 1$ ) the other results into the following piecewise  
 530 solution of  $x^*$ ,

$$x^*(p) = \begin{cases} 0 & \text{for } 0.5 \leq p \leq 0.75 \text{ (Dormant)} \\ x_{max}^+ & \text{for } \frac{1}{19} (10 - \sqrt{62}) < p < 0.5 \text{ and } 0.75 < p < \frac{1}{19} (10 + \sqrt{62}) \text{ (Bet Hedging)} \\ 1 & \text{for } p \leq \frac{1}{19} (10 - \sqrt{62}) \text{ or } p \geq \frac{1}{19} (10 + \sqrt{62}) \text{ (Germinate)}. \end{cases} \quad (\text{A.14})$$

531 This shows an interesting situation where there are two regions of bet-hedging. The first one  
 532 changes the phenotype from pure germination to pure dormancy and vice versa in the second  
 533 region (Fig. A.1). The growth rate without the cue therefore is given by,

$$G(E) = \begin{cases} \log(3) & \text{for } 0.5 \leq p \leq 0.75 \\ -H(E) + p^2 \log\left(\frac{9-\phi}{4p^2}\right) \\ \quad + 2p(1-p) \log\left(\frac{\phi+9}{4(1-p)p}\right) \\ \quad + (1-p)^2 \log\left(\frac{3(1-\phi)}{4(1-p)^2}\right) & \text{for } \frac{1}{19}(10 - \sqrt{62}) < p < 0.5 \text{ and } 0.75 < p < \frac{1}{19}(10 + \sqrt{62}) \\ p^2 \log(4) + (1-p)^2 \log(6) & \text{for } p \leq \frac{1}{19}(10 - \sqrt{62}) \text{ or } p \geq \frac{1}{19}(10 + \sqrt{62}) \end{cases} \quad (\text{A.15})$$

534 where we use the abbreviation

535  $\phi = 10p - 14p^2 - \sqrt{196p^4 - 280p^3 + 208p^2 - 180p + 81}$ . For a perfectly informative cue the  
 536 long term fitness value is,  $G(E|C) = p^2 \log 4 + 2p(1-p) \log 3 + (1-p)^2 \log 6$ . The gain in  
 537 fitness due to knowing the environment, i.e. the fitness value of information is therefore given  
 538 by,  $\Delta G(E; C) = G(E|C) - G(E)$ ,

$$\Delta G(E; C) = \begin{cases} p^2 \log 4/3 + (1-p)^2 \log 2 & \text{for } 0.5 \leq p \leq 0.75 \\ H(E) + p^2 \log\left(\frac{4p^2}{4-\phi}\right) \\ \quad + 2p(1-p) \log\left(\frac{6(1-p)p}{2\phi+1}\right) \\ \quad + (1-p)^2 \log\left(\frac{2(1-p)^2}{2-\phi}\right) & \text{for } \frac{1}{19}(10 - \sqrt{62}) < p < 0.5 \text{ and } 0.75 < p < \frac{1}{19}(10 + \sqrt{62}) \\ 2p(1-p) \log 3 & \text{for } p \leq \frac{1}{19}(10 - \sqrt{62}) \text{ or } p \geq \frac{1}{19}(10 + \sqrt{62}). \end{cases} \quad (\text{A.16})$$

539 Thus even for this complicated case with two regions of bet hedging we can see that the value  
 540 of the cue is a composite of the mutual information between the environment and the cue and  
 541 a non-linear function in  $p$ , which can be interpreted as the probability of a single flood.
